# Supplementary material
Source: PubMed Central journal article supplement (PMC7187563)

## Donor 1

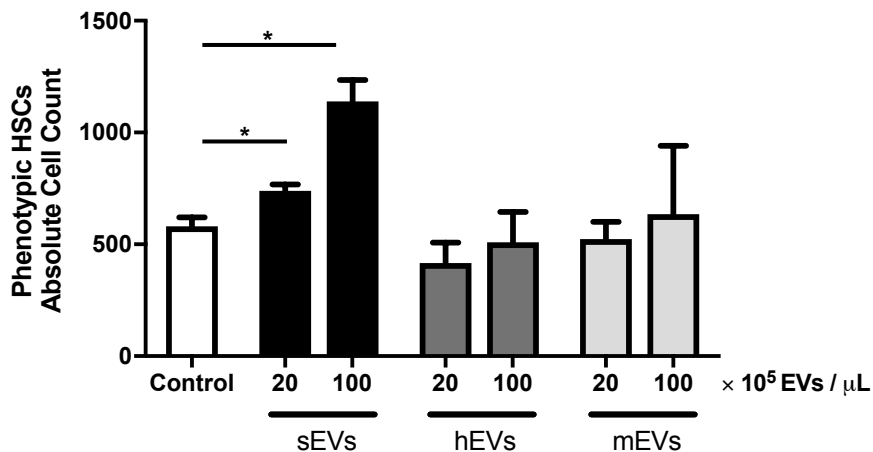

## Donor 2

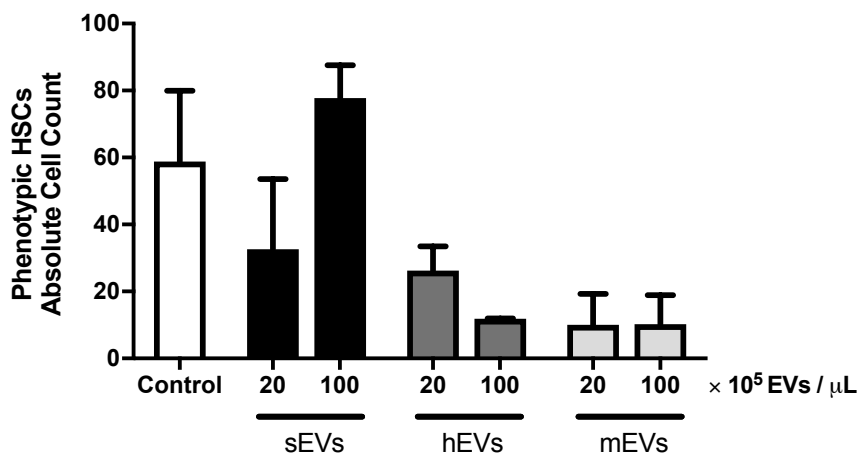

## Donor 3

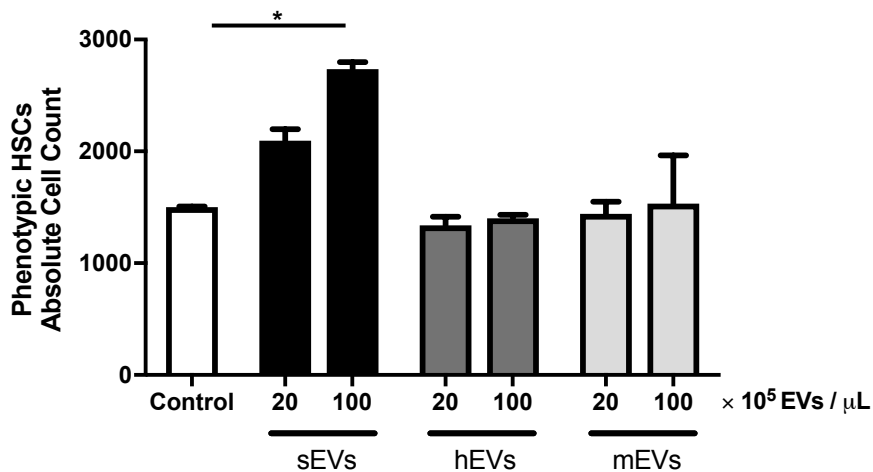

Supplement: FSB2-34-5435-s001.pdf [file FSB2-34-5435-s001.pdf]

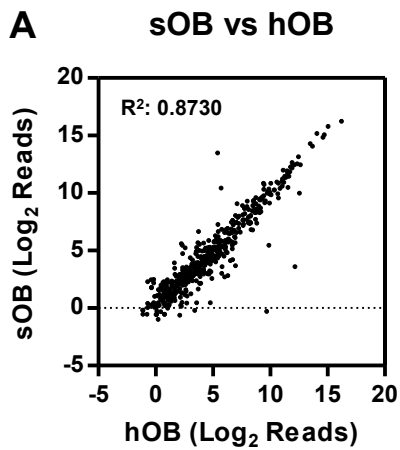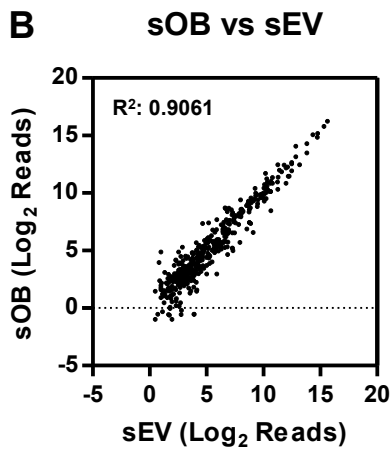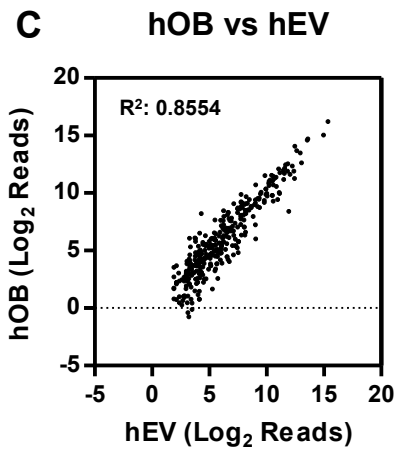

Supplement: FSB2-34-5435-s002.pdf [file FSB2-34-5435-s002.pdf]

A

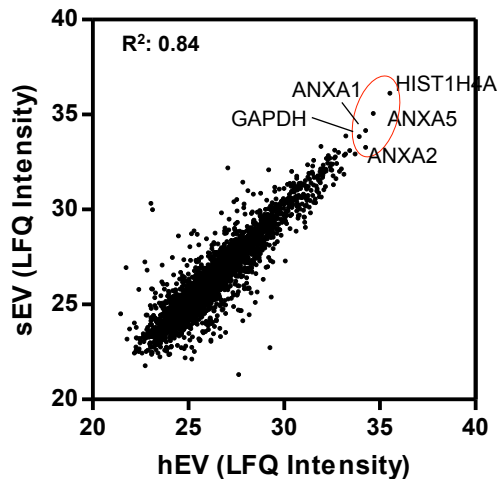

B

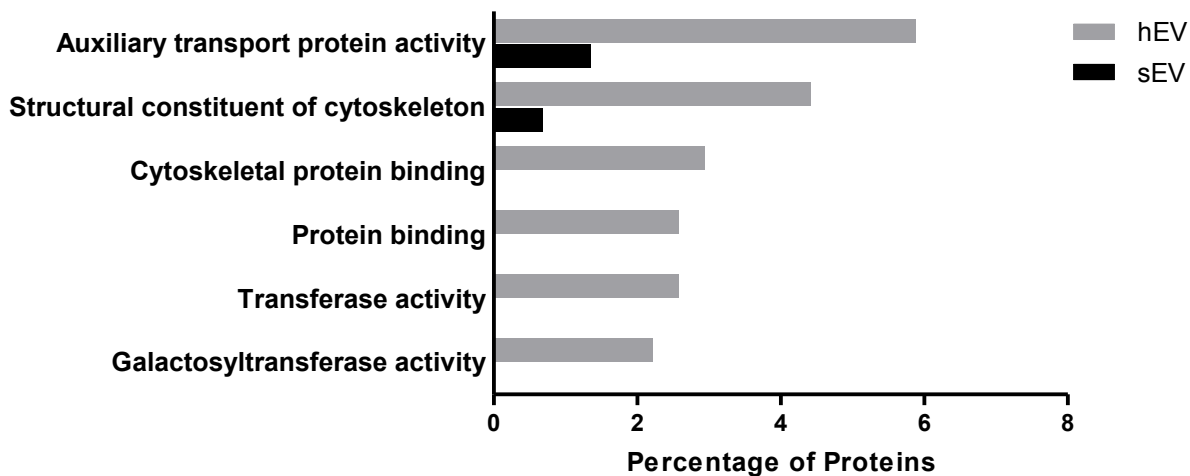

Supplement: FSB2-34-5435-s003.pdf [file FSB2-34-5435-s003.pdf]
